# Supplementary material
Source: publisher figshare collection journal article supplement (https://frontiersin.figshare.com/ndownloader/files/25159460)
Supplement: Supplementary file 1 [file 25159460]

Appendix A

*Results of the Multilevel Analyses Predicting Frequency and Valence in Observed Teacher Behavior with Socially Marginal Students, for Each Facet Separately*

|  | Solitude | | |  | Not belonging to a group | | |  | Unpopularity | | |
| --- | --- | --- | --- | --- | --- | --- | --- | --- | --- | --- | --- |
|  | Frequency | Affective valence | Cognitive valence |  | Frequency | Affective valence | Cognitive valence |  | Frequency | Affective valence | Cognitive valence |
|  | *B* (*SE*) | *B* (*SE*) | *B* (*SE*) |  | *B* (*SE*) | *B* (*SE*) | *B* (*SE*) |  | *B* (*SE*) | *B* (*SE*) | *B* (*SE*) |
| Between-student variation | | | | | | | | | | | |
| Marginalitya | -3.98 (3.16) | -0.04 (0.08) | 0.10 (0.05) |  | 0.35 (5.52) | -0.05 (0.16) | 0.06 (0.10) |  | -12.06 (3.25)** | 0.01 (0.08) | 0.07 (0.05) |
| Peer rejection | 7.70 (3.59)* | -0.33 (0.09)** | -0.11 (0.06) |  | 9.46 (3.55)** | -0.23 (0.10)* | -0.12 (0.07) |  | 15.65 (3.49)** | -0.32 (0.09)** | -0.12 (0.06)* |
| Inclusion goals | 0.42 (0.64) | 0.01 (0.02) | -0.00 (0.01) |  | 0.00 (0.63) | -0.00 (0.02) | 0.01 (0.01) |  | 0.03 (0.56) | -0.00 (0.01) | 0.00 (0.01) |
| *R*2 | .13 | .88 | .43 |  | .21 | .00 | .60 |  | .21 | .80 | .00 |
| Within-student momentary variation | | | | | | | | | | | |
| Marginalitya | -3.86 (4.77) | 0.01 (0.18) | 0.23 (0.12) |  | 15.66 (6.12)* | 0.09 (0.20) | -0.04 (0.15) |  | -3.01 (4.17) | 0.02 (0.15) | 0.12 (0.10) |
| Peer rejection | 3.92 (5.73) | -0.38 (0.21) | -0.30 (0.14)* |  | 4.30 (5.81) | -0.42 (0.19)* | -0.26 (0.14) |  | 0.48 (0.67) | -0.26 (0.20) | -0.29 (0.13)* |
| Inclusion goals | 0.28 (0.73) | -0.01 (0.03) | -0.00 (0.01) |  | 0.00 (0.63) | 0.00 (0.03) | 0.01 (0.02) |  | 2.86 (5.49) | -0.00 (0.02) | 0.02 (0.02) |
| *R*2 | .28 | .00 | .00 |  | .20 | .00 | .00 |  | .02 | .00 | .02 |

aFor each of the social marginality facets, the severity of marginality on that specific facet was included in the analyses.
* *p* < .05. ** *p* < .01.

Appendix B

*Results of the Growth Curve Model Predicting the Slope of Social Marginality, for each Facet Separately*

|  | |  | Solitude | |  | Not belonging | |  | Unpopularity | |
| --- | --- | --- | --- | --- | --- | --- | --- | --- | --- | --- |
|  | |  | M1 | M2 |  | M1 | M2 |  | M1 | M2 |
|  | |  | *B* (*SE*) | *B* (*SE*) |  | *B* (*SE*) | *B* (*SE*) |  | *B* (*SE*) | *B* (*SE*) |
| Main effects | | |  |  |  |  |  |  |  |  |
|  | Observed frequency | | 0.00 (0.00) | 0.00 (0.00) |  | 0.00 (0.00) | -0.00 (0.00) |  | -0.00 (0.00) | -0.00 (0.00) |
|  | Observed affective valence | | -0.02 (0.03) | -0.07 (0.10) |  | -0.02 (0.02) | -0.03 (0.05) |  | -0.00 (0.02) | 0.02 (0.06) |
|  | Observed cognitive valence | | -0.01 (0.03) | -0.12 (0.11) |  | 0.05 (0.02)* | 0.01 (0.07) |  | 0.02 (0.03) | 0.22 (0.13) |
|  | Peer-perceived frequency | | 0.02 (0.07) | -0.07 (0.23) |  | -0.08 (0.05) | -0.05 (0.15) |  | 0.03 (0.08) | 0.01 (0.17) |
|  | Peer-perceived valence | | -0.03 (0.03) | 0.11 (0.13) |  | -0.02 (0.08) | 0.01 (0.07) |  | -0.02 (0.03) | -0.08 (0.12) |
|  | Peer rejection | |  | 0.22 (0.07)** |  |  | 0.05 (0.04) |  |  | 0.10 (0.07) |
|  | Social desire | |  | 0.01 (0.01) |  |  | 0.01 (0.01) |  |  | 0.00 (0.01) |
| Interaction with *rejection* | | |  |  |  |  |  |  |  |  |
|  | Observed frequency | |  | -0.00 (0.00) |  |  | -0.00 (0.00) |  |  | -0.01 (0.00)* |
|  | Observed affective valence | |  | -0.39 (0.21)† |  |  | -0.36 (0.11)** |  |  | 0.17 (0.13) |
|  | Observed cognitive valence | |  | -0.60 (0.26)* |  |  | -0.41 (0.22)† |  |  | -0.00 (0.30) |
|  | Peer-perceived frequency | |  | 0.89 (0.61) |  |  | -0.02 (0.29) |  |  | 0.60 (0.38) |
|  | Peer-perceived valence | |  | 0.16 (0.10) |  |  | 0.10 (0.08) |  |  | -0.05 (0.12) |
| Interaction with *inclusion goals* | | |  |  |  |  |  |  |  |  |
|  | Observed frequency | |  | -0.00 (0.00) |  |  | 0.00 (0.00) |  |  | 0.00 (0.00) |
|  | Observed affective valence | |  | 0.03 (0.03) |  |  | 0.01 (0.02) |  |  | -0.01 (0.02) |
|  | Observed cognitive valence | |  | 0.06 (0.04) |  |  | 0.02 (0.03) |  |  | -0.07 (0.05) |
|  | Peer-perceived frequency | |  | 0.02 (0.07) |  |  | -0.01 (0.05) |  |  | -0.02 (0.06) |
|  | Peer-perceived valence | |  | -0.03 (0.03) |  |  | -0.00 (0.02) |  |  | 0.03 (0.03) |
| *R*2 slope | |  | .03 | .27 |  | .07 | .25 |  | .01 | .07 |

† *p* < .10. * *p* < .05. ** *p* < .01.
